# Supplementary material
Source: MDPI journal article supplement (https://www.mdpi.com/1424-2818/13/11/533)
Supplement: s1 [file s1]

## Supplementary Materials

### Comparative Floral and Pollen Micromorphology of *Leonurus japonicus* and *L. macranthus* (Lamiaceae)

Min-Kyeong Oak <sup>1</sup>, Sungyu Yang <sup>2</sup>, Goya Choi <sup>2</sup> and Jun-Ho Song <sup>2,\*</sup>

<sup>1</sup> Temperate Middle Part Plant Conservation Team, Sejong National Arboretum, Sejong 30106, Republic of Korea; mko221@kiam.or.kr (M.-K.O.).

<sup>2</sup> Herbal Medicine Resources Research Center, Korea Institute of Oriental Medicine, Naju 58245, Republic of Korea; sgyang81@kiom.re.kr (S.Y.); serparas@kiom.re.kr (G.C.).

\* Correspondence: songjh@kiom.re.kr; Tel.: +82-61-338-7117

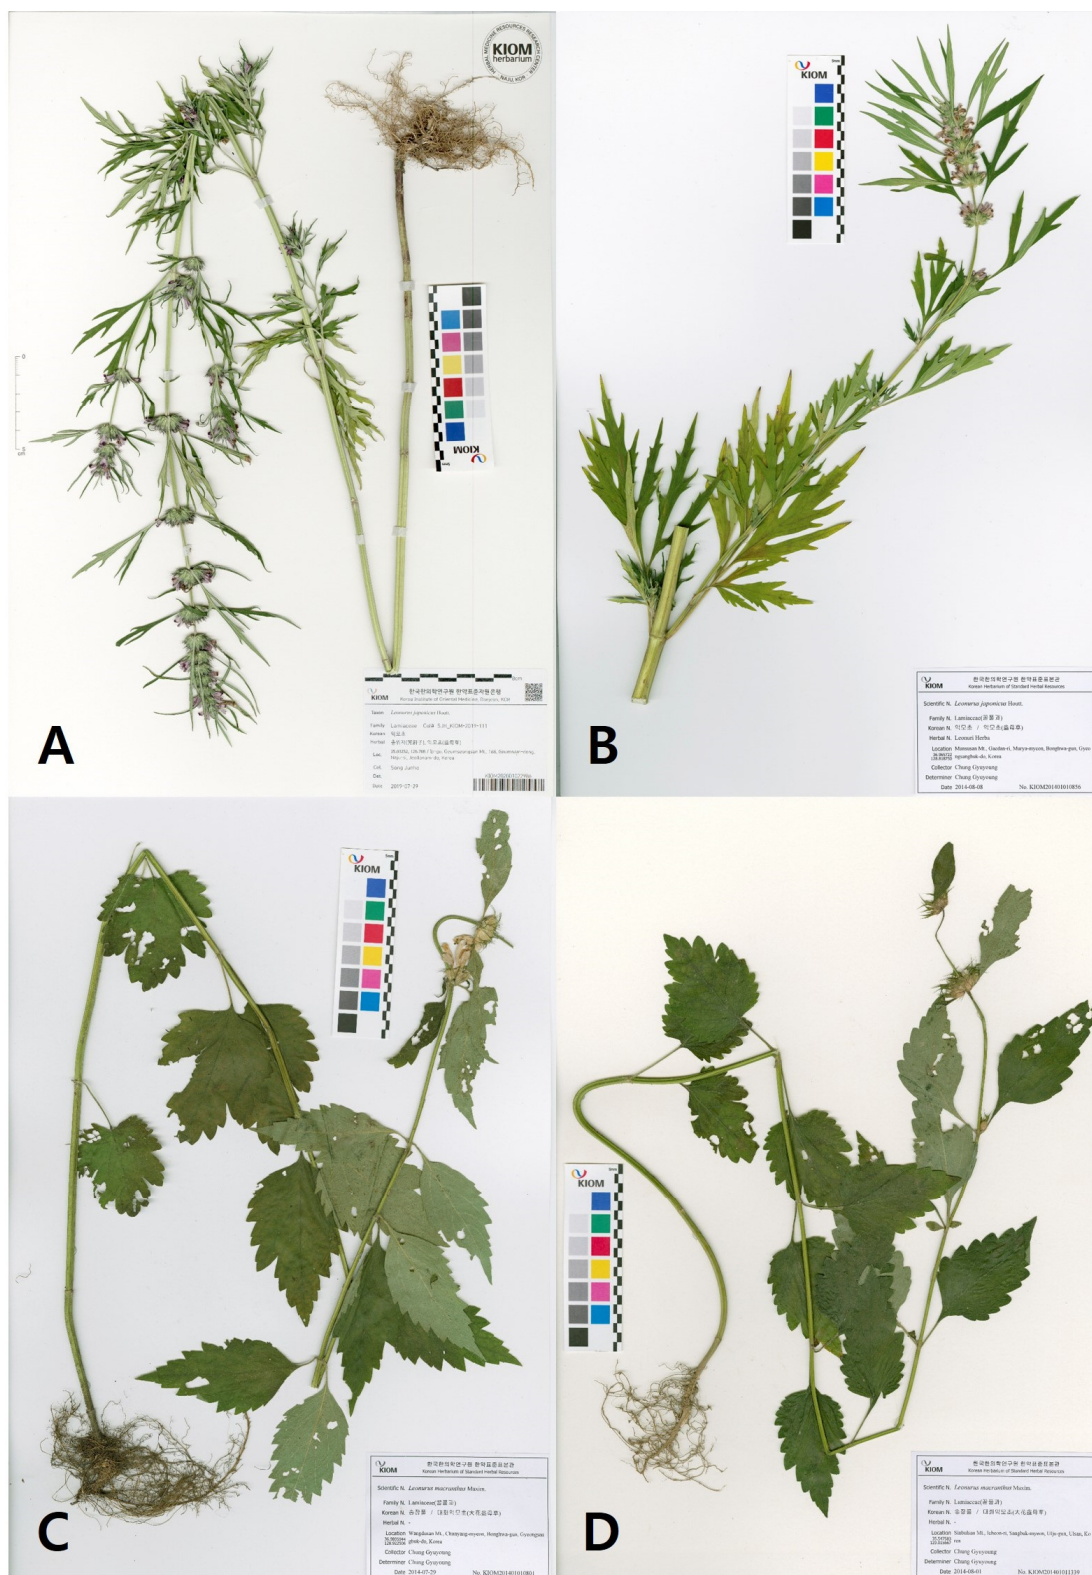

**Figure S1.** Digital image of voucher specimen of *Leonurus* species that are examined in the present study. (A–B) *L. japonicus*. (C–D) *L. macranthus*.

**Table S1.** Voucher information of *Leonurus* species that are examined in the present study.

| No. | Species                     | Collection Information (Site/Data)                                                      | Coordinates                   | Voucher Number   |
|-----|-----------------------------|-----------------------------------------------------------------------------------------|-------------------------------|------------------|
| 1   | <i>L. japonicus</i> Houtt   | Geumseongsan Mt., Geumnam-dong, Naju-si, Jeollanam-do, Korea / 2019-07-29               | 35°01'57.1"N<br>126°42'30.4"E | KIOM202001022986 |
| 2   | <i>L. japonicus</i> Houtt   | Munsusan Mt., Gaedan-ri, Murya-myeon, Bonghwa-gun, Gyeongsangbuk-do, Korea / 2014-08-08 | 36°57'56.6"N<br>128°49'07.5"E | KIOM201401010856 |
| 3   | <i>L. macranthus</i> Maxim. | Wangdusan Mt., Chunyang-myeon, Bonghwa-gun, Gyeongsangbuk-do, Korea / 2014-07-29        | 36°59'22.5"N<br>128°55'21.0"E | KIOM201401010801 |
| 4   | <i>L. macranthus</i> Maxim. | Sinbulsan Mt., Icheon-ri, Sangbuk-myeon, Ulju-gun, Ulsan, Korea / 2014-08-01            | 35°32'51.3"N<br>129°00'56.4"E | KIOM201401011339 |
